# Supplementary material
Source: PubMed Central journal article supplement (PMC6032893)

**Supplementary Table 1 Demographic and treatment characteristics of 2-year survivors of autologous BMT in childhood, by treatment era**

|                               |                                      | Entire cohort                         |       | Year of BMT |      |           |      |           |      | p-value |
|-------------------------------|--------------------------------------|---------------------------------------|-------|-------------|------|-----------|------|-----------|------|---------|
|                               |                                      |                                       |       | <1990       |      | 1990-1999 |      | 2000-2010 |      |         |
|                               |                                      | N                                     | %     | N           | %    | N         | %    | N         | %    |         |
| Number of patients            |                                      | 345                                   | 100.0 | 74          | 20.4 | 129       | 37.3 | 142       | 42.3 |         |
| Sex                           | Male                                 | 224                                   | 61.9  | 55          | 74.3 | 65        | 50.4 | 92        | 64.8 | 0.002   |
|                               | Female                               | 133                                   | 38.6  | 19          | 25.7 | 64        | 49.6 | 50        | 35.2 |         |
| Race                          | Non-Hispanic white                   | 277                                   | 76.5  | 69          | 93.2 | 94        | 72.9 | 101       | 71.1 | 0.002   |
|                               | Hispanic                             | 44                                    | 12.2  | 1           | 1.4  | 17        | 13.2 | 26        | 18.3 |         |
|                               | Non-Hispanic black                   | 24                                    | 6.6   | 3           | 4.1  | 11        | 8.5  | 6         | 4.2  |         |
|                               | Others                               | 10                                    | 2.8   | 1           | 1.4  | 5         | 3.9  | 4         | 2.8  |         |
|                               | Unknown                              | 7                                     | 1.9   | 0           | 0.0  | 2         | 1.6  | 5         | 3.5  |         |
| Age at transplantation, years | 0-4                                  | 100                                   | 27.6  | 22          | 29.7 | 35        | 27.1 | 40        | 28.2 | 0.1     |
|                               | 5-9                                  | 60                                    | 16.6  | 16          | 21.6 | 26        | 20.2 | 15        | 10.6 |         |
|                               | 10-14                                | 55                                    | 15.2  | 15          | 20.3 | 17        | 13.2 | 23        | 16.2 |         |
|                               | 15-21                                | 147                                   | 40.6  | 21          | 28.4 | 51        | 39.5 | 64        | 45.1 |         |
| Source of stem cells          | Bone marrow                          | 164                                   | 45.3  | 71          | 95.9 | 84        | 65.1 | 8         | 5.6  | <0.0001 |
|                               | PBSCs                                | 197                                   | 54.4  | 3           | 4.1  | 45        | 34.9 | 133       | 93.7 |         |
|                               | Cord blood                           | 1                                     | 0.3   | 0           | 0.0  | 0         | 0.0  | 1         | 0.7  |         |
| Primary disease               | ALL                                  | 43                                    | 11.9  | 34          | 45.9 | 9         | 7.0  | 0         | 0.0  | <0.0001 |
|                               | AML                                  | 47                                    | 13.0  | 12          | 16.2 | 25        | 19.4 | 8         | 5.6  |         |
|                               | HL                                   | 96                                    | 26.5  | 11          | 14.9 | 32        | 24.8 | 47        | 33.1 |         |
|                               | NHL                                  | 34                                    | 9.4   | 9           | 12.2 | 11        | 8.5  | 11        | 7.8  |         |
|                               | Neuroblastoma                        | 83                                    | 22.9  | 7           | 9.5  | 31        | 24.0 | 41        | 28.9 |         |
|                               | Other malignant disease <sup>#</sup> | 59                                    | 16.3  | 1           | 1.4  | 21        | 16.3 | 35        | 24.7 |         |
| Conditioning regimen          | TBI                                  | 124                                   | 34.3  | 49          | 66.2 | 52        | 40.3 | 23        | 16.2 | <0.0001 |
|                               | Etoposide                            | 217                                   | 59.9  | 21          | 28.4 | 85        | 65.9 | 98        | 69.0 | <0.0001 |
|                               | Cyclophosphamide                     | 206                                   | 56.9  | 59          | 79.7 | 84        | 65.1 | 49        | 34.5 | <0.0001 |
|                               | Melphalan                            | 134                                   | 37.0  | 3           | 4.1  | 44        | 34.1 | 86        | 60.6 | <0.0001 |
|                               | Busulfan                             | 82                                    | 22.7  | 11          | 14.9 | 23        | 17.8 | 41        | 28.9 | 0.02    |
|                               | Carmustine                           | 78                                    | 21.5  | 14          | 18.9 | 23        | 17.8 | 39        | 27.5 | 0.1     |
|                               | Carboplatin                          | 73                                    | 20.2  | 0           | 0.0  | 32        | 24.8 | 39        | 27.5 | <0.0001 |
|                               | Other chemotherapy                   | 143                                   | 39.5  | 56          | 75.7 | 41        | 31.8 | 46        | 32.4 | <0.0001 |
|                               | Other radiotherapy                   | 3                                     | 0.8   | 0           | 0.0  | 0         | 0.0  | 3         | 2.1  | 0.2     |
|                               | Disease status at transplantation    | Standard risk of relapse <sup>*</sup> | 133   | 37.8        | 47   | 63.5      | 53   | 41.1      | 33   | 23.2    |
| High risk of relapse          |                                      | 212                                   | 61.5  | 27          | 36.5 | 76        | 58.9 | 109       | 76.8 | <0.0001 |
| Number of deaths              |                                      | 103                                   | 28.5  | 33          | 44.6 | 37        | 28.7 | 33        | 23.2 | 0.005   |

<sup>\*</sup>Standard risk: 1st or 2nd CR after acute leukemia or lymphoma; all others high risk; ALL=acute lymphoblastic leukemia, AML=acute myeloid leukemia, HL=Hodgkin lymphoma, NHL=non-Hodgkin lymphoma, PBSCs=peripheral blood stem cells;

<sup>#</sup>include 25 Ewing sarcomas, 11 Wilms tumor, 9 CNS tumors, 4 desmoplastic small round cell tumors, 6 soft tissue sarcoma, 1 ovarian tumor, 1 hepatoblastoma, 1 multiple myeloma

**Supplementary Table 2 Cause of death among 2-year survivors after autologous BMT in childhood**

|                                        |                                      | Cause of death  |       |                 |       |    |      |           |      |         |      |           |      |              |      |                 |       |
|----------------------------------------|--------------------------------------|-----------------|-------|-----------------|-------|----|------|-----------|------|---------|------|-----------|------|--------------|------|-----------------|-------|
|                                        |                                      | All-cause death |       | Primary disease |       | SN |      | Infection |      | Cardiac |      | Pulmonary |      | Other causes |      | External causes |       |
|                                        |                                      | N               | %     | N               | %     | N  | %    | N         | %    | N       | %    | N         | %    | N            | %    | N               | %     |
| <b>Deceased with a registered COD*</b> |                                      | 98              | 100.0 | 49              | 50.0  | 21 | 21.4 | 18        | 18.4 | 7       | 7.1  | 4         | 4.1  | 13           | 13.3 | 3               | 3.1   |
| Sex                                    | Male                                 | 51              | 52.0  | 20              | 40.8  | 12 | 57.1 | 10        | 55.6 | 2       | 28.6 | 3         | 75.0 | 11           | 84.6 | 3               | 100.0 |
|                                        | Female                               | 47              | 48.0  | 29              | 59.2  | 9  | 42.9 | 8         | 44.4 | 5       | 71.4 | 1         | 25.0 | 2            | 15.4 | 0               | 0.0   |
| Primary diagnosis                      | ALL                                  | 21              | 21.4  | 9               | 18.4  | 6  | 28.6 | 4         | 22.2 | 0       | 0.0  | 1         | 25.0 | 6            | 46.2 | 1               | 33.3  |
|                                        | AML                                  | 6               | 6.1   | 1               | 2.0   | 4  | 19.1 | 1         | 5.6  | 2       | 28.6 | 0         | 0.0  | 0            | 0.0  | 0               | 0.0   |
|                                        | HL                                   | 20              | 20.4  | 6               | 12.2  | 7  | 33.3 | 5         | 27.8 | 2       | 28.6 | 1         | 25.0 | 3            | 23.1 | 0               | 0.0   |
|                                        | NHL                                  | 7               | 7.1   | 0               | 0.0   | 3  | 14.3 | 3         | 16.7 | 0       | 0.0  | 1         | 25.0 | 0            | 0.0  | 2               | 66.7  |
|                                        | Neuroblastoma                        | 24              | 24.5  | 18              | 36.7  | 1  | 4.8  | 4         | 22.2 | 0       | 0.0  | 0         | 0.0  | 3            | 23.1 | 0               | 0.0   |
|                                        | Other malignant disease <sup>#</sup> | 20              | 20.4  | 15              | 30.6  | 0  | 0.0  | 1         | 5.6  | 3       | 42.9 | 1         | 25.0 | 1            | 7.7  | 0               | 0.0   |
| Time since BMT (years)                 | 2-9                                  | 84              | 85.7  | 49              | 100.0 | 13 | 61.9 | 17        | 94.4 | 5       | 71.4 | 3         | 75   | 10           | 76.9 | 0               | 0.0   |
|                                        | 10-14                                | 9               | 9.2   | 0               | 0.0   | 5  | 23.8 | 1         | 5.6  | 1       | 14.3 | 1         | 25.0 | 2            | 15.4 | 2               | 66.7  |
|                                        | 15+                                  | 5               | 5.1   | 0               | 0.0   | 3  | 14.2 |           | 0.0  | 1       | 14.3 | 0         | 0.0  | 1            | 7.7  | 1               | 33.3  |

\*Among 98 of the 103 deceased patients, 115 causes of death were identified as a primary or secondary cause of death in the NDI Plus program. SN=second neoplasm, ALL=acute lymphoblastic leukemia, AML=acute myeloid leukemia, HL=Hodgkin lymphoma, NHL=non-Hodgkin lymphoma; <sup>#</sup>include 25 Ewing sarcomas, 11 Wilms tumor, 9 CNS tumors, 4 desmoplastic small round cell tumors, 6 soft tissue sarcoma, 1 ovarian tumor, 1 hepatoblastoma, 1 multiple myeloma.

**Figure legend Supplementary Figure 1**

Cumulative relapse-related mortality in 2-year survivors of autologous BMT in childhood, by sex and treatment era

# Supplementary Figure 1

< 1990

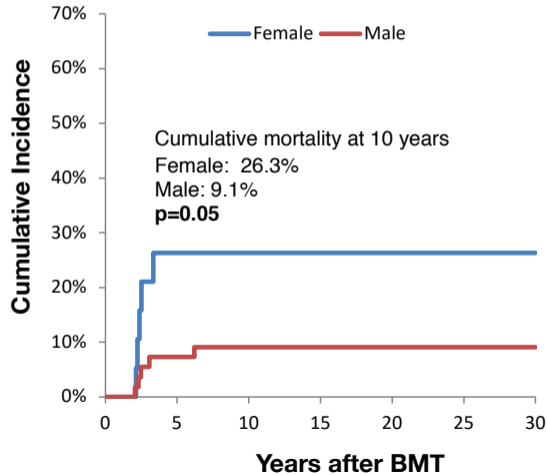

1990 – 1999

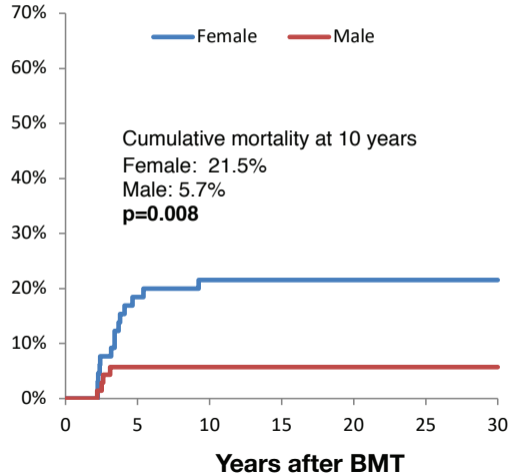

2000 – 2010

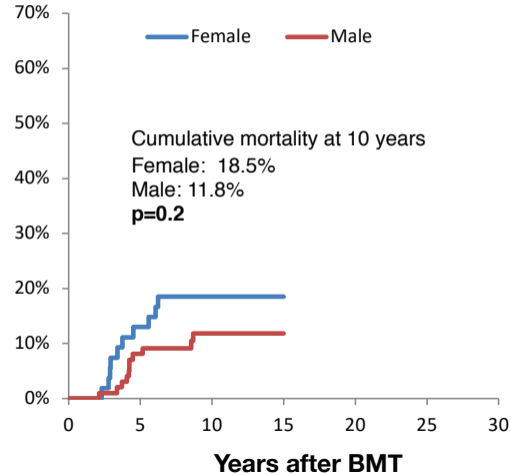

Supplement: blood831156-suppl1.pdf [file blood831156-suppl1.pdf]
